# Supplementary material
Source: publisher site journal article supplement (https://www.dovepress.com/article/355391)
Supplement: Supplementary file 1 [file get_supplementary_file.php]

**Supplementary Figure 1.** Proportion of patients with NPS and NC score change (improved, stable, and worsened) over time (Weeks 4 [NC] or 8 [NPS] through Week 24) (pooled analysis of SINUS-24 and SINUS-52).

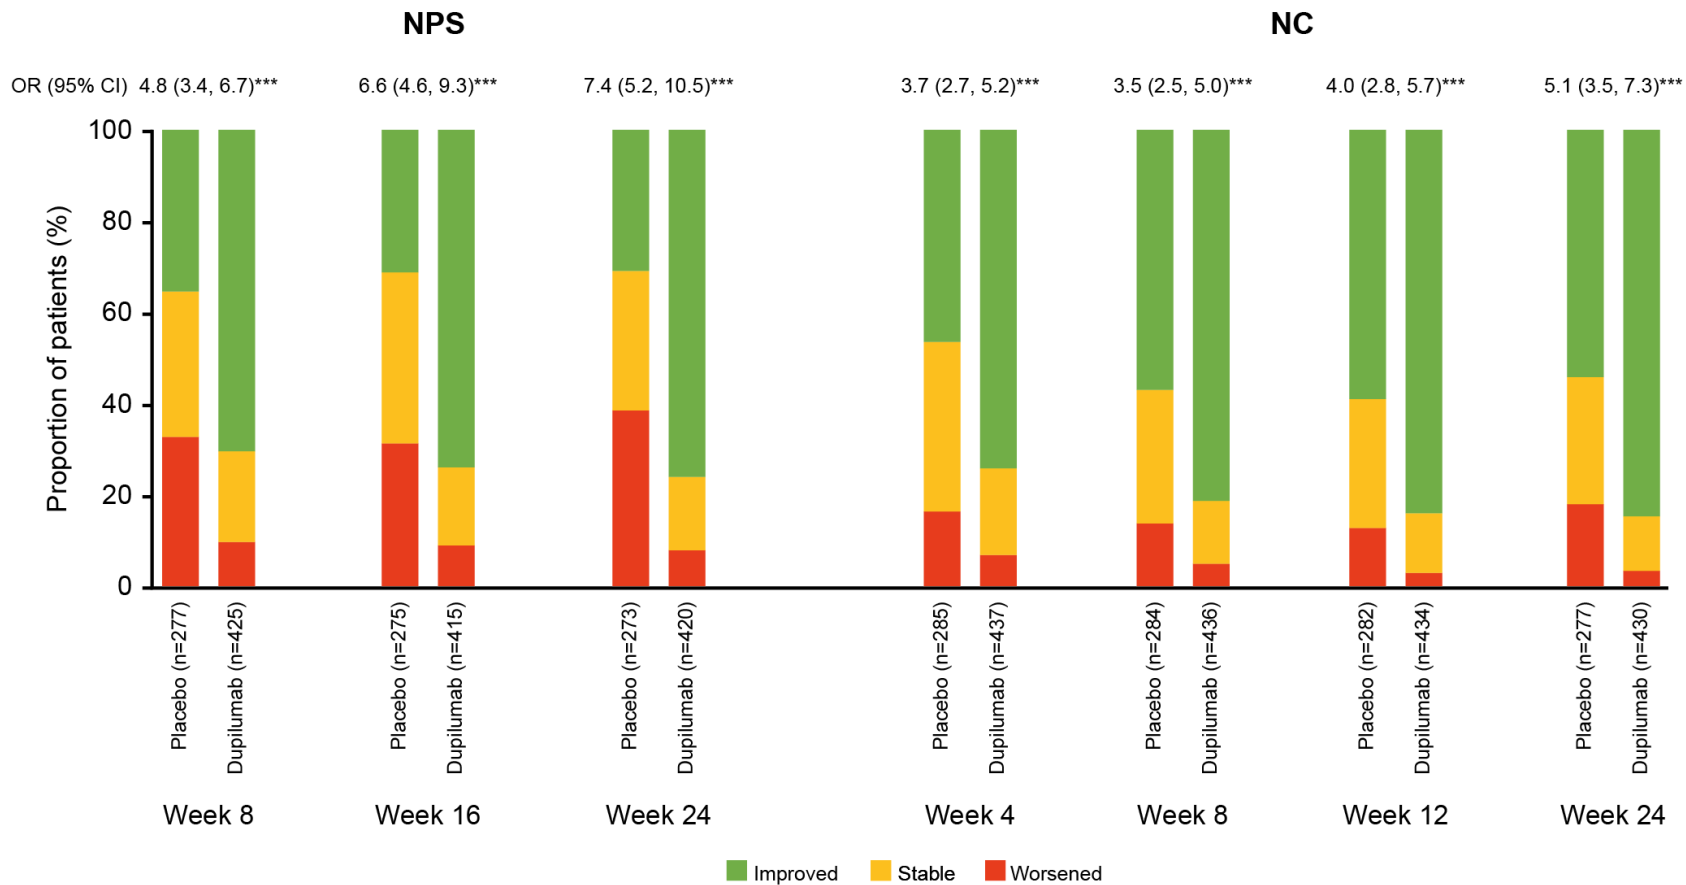

\*\*\* $p < 0.0001$ .

**Notes:** The proportion of patients treated with placebo or dupilumab 300 mg q2w with improvement (change from baseline  $<0$ ), stable (change = 0), and worsening (change  $>0$ ) of NPS or NC over time in the pooled SINUS-24 and SINUS-52 population. ORs for improvement with dupilumab vs placebo are shown above each pair of bars (patients with improvement were considered as responders and patients with no change or worsening were considered as non-responders). The results for dupilumab are pooled data from the dupilumab 300 mg q2w and 300 mg q2w–q4w arms from SINUS-24 and SINUS-52.

**Abbreviations:** CI, confidence interval; NC, nasal congestion/obstruction; NPS, nasal polyp score; OR, odds ratio; q2w, every 2 weeks; q4w, every 4 weeks.

**Supplementary Figure 2.** Proportion of patients with score change (stable, worsened, and categories of improvement) in A) NPS at Weeks 8 and 24 and B) NC at Weeks 4 and 24 (pooled analysis of SINUS-24 and SINUS-52).

**A) NPS in pooled SINUS-24 and SINUS-52 at Weeks 8 and 24**

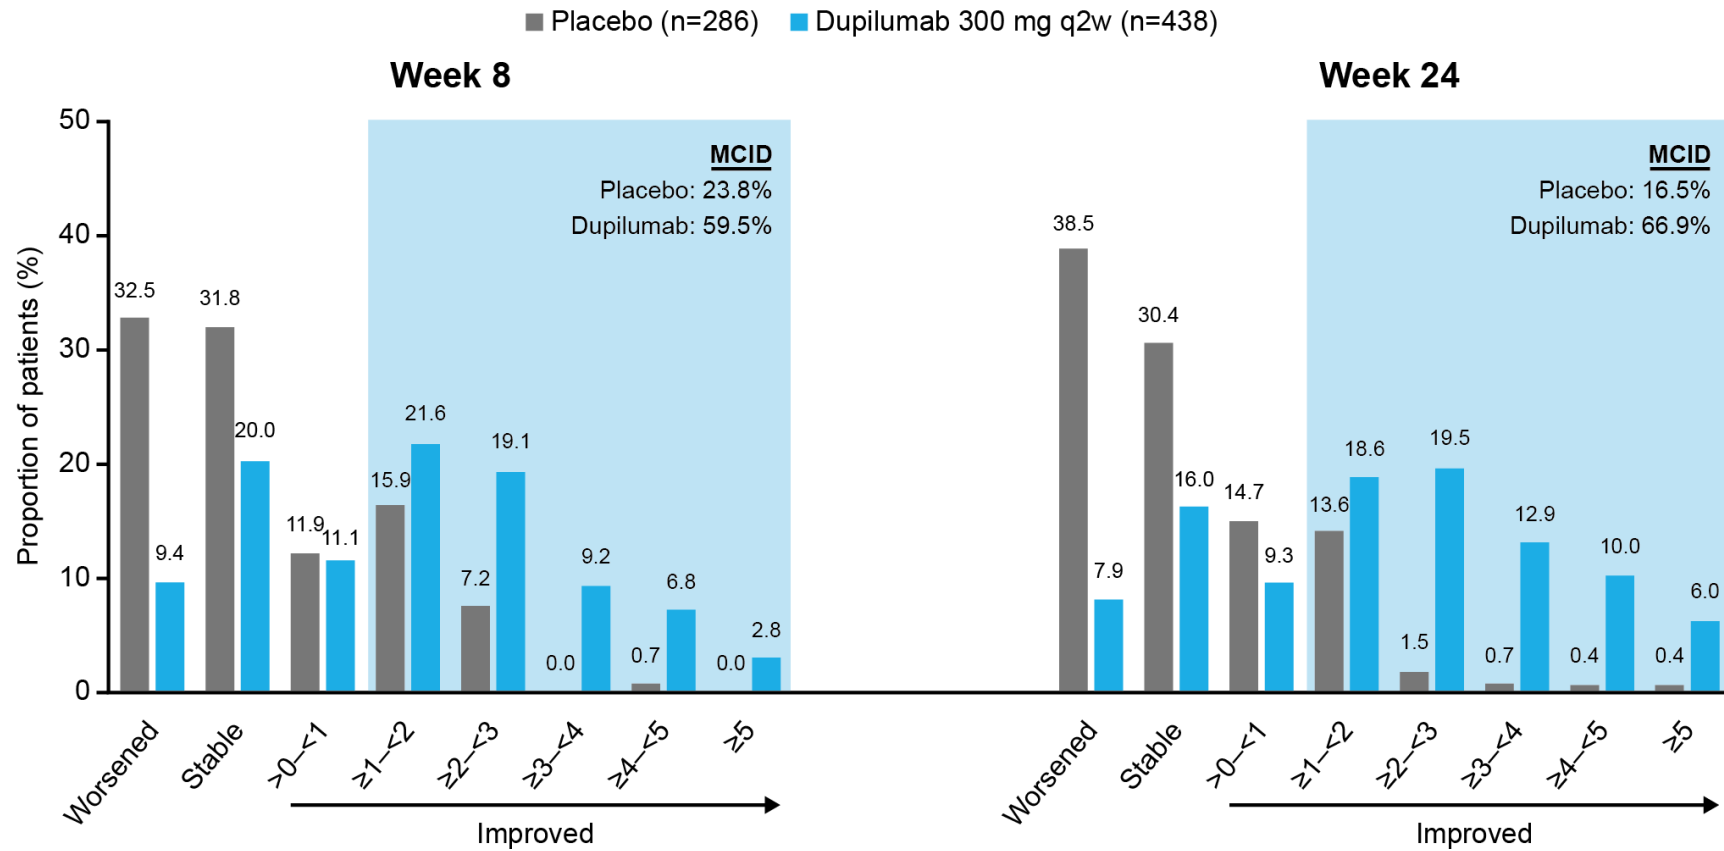

**B) NC in pooled SINUS-24 and SINUS-52 at Weeks 4 and 24**

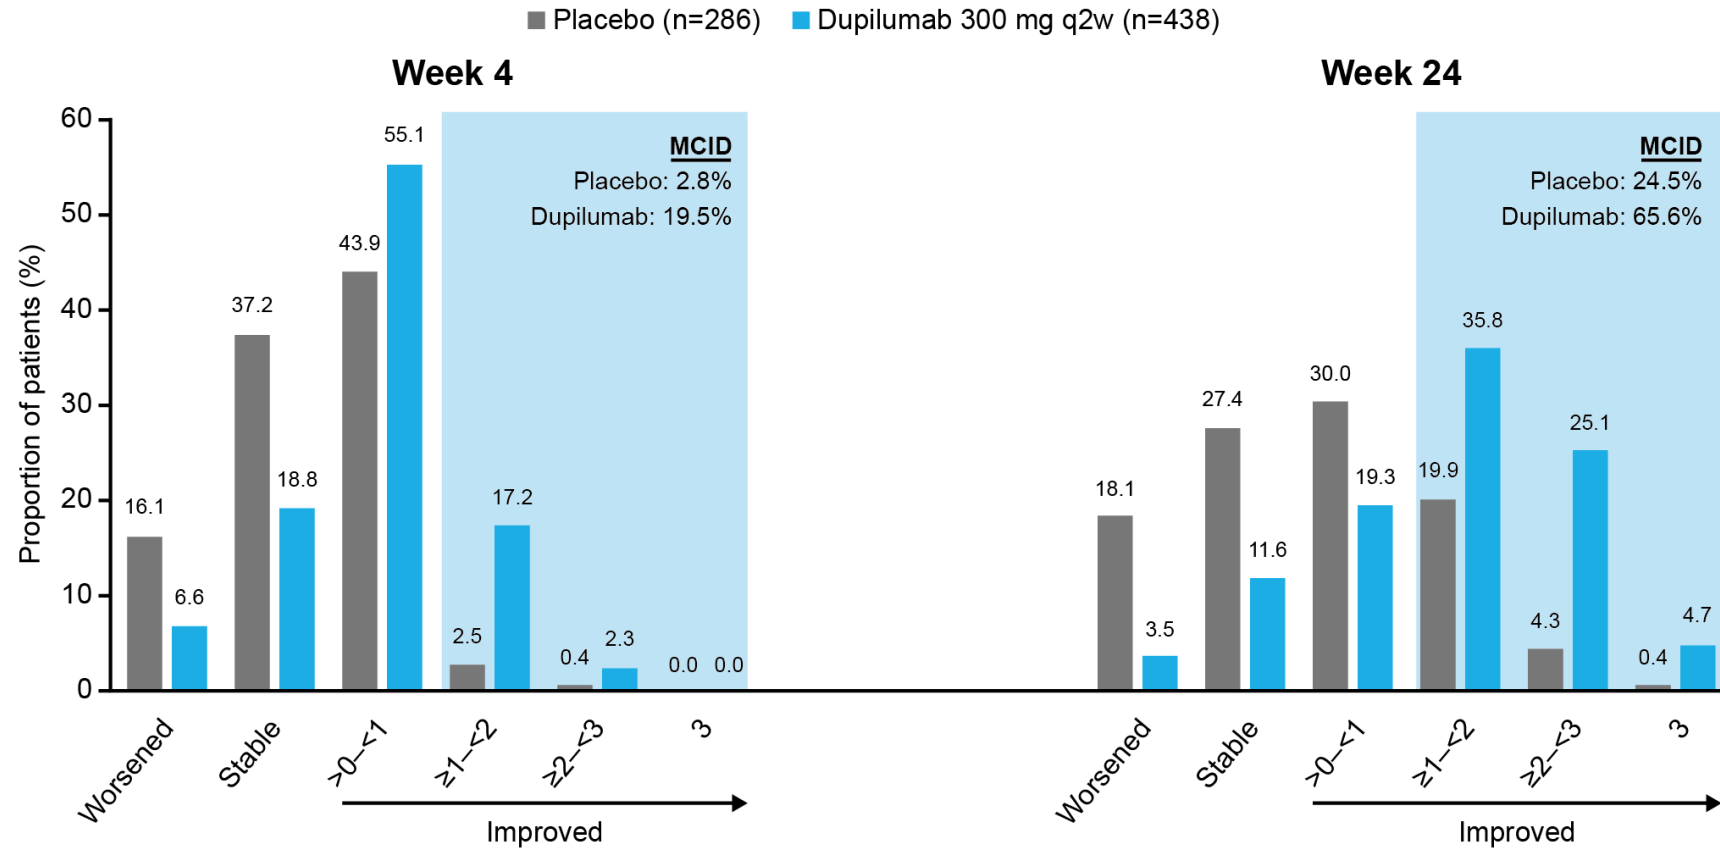

**Notes:** The first post-baseline assessment for NPS in SINUS-24 was at Week 8, so pooled SINUS-24 and SINUS-52 data shown here start at Week 8.

The proportion of patients treated with placebo or dupilumab 300 mg q2w in the pooled SINUS-24 and SINUS-52 population with improvement in A)

NPS at Weeks 8 and 24 and or B) NC at Weeks 4 and 24, according to absolute category of improvement. The shaded area represents clinically important improvement ( $\geq 1$ -point improvement). The proportions of patients with stable (change = 0) or worsening (change  $> 0$ ) of NPS or NC are shown for comparison. The results for dupilumab are pooled data from the dupilumab 300 mg q2w and 300 mg q2w–q4w arms from SINUS-24 and SINUS-52.

**Abbreviations:** MCID, minimum clinically important difference; NC, nasal congestion/obstruction; NPS, nasal polyp score; q2w, every 2 weeks; q4w, every 4 weeks.

**Supplementary Table 1.** List of Institutional Review Boards and Independent Ethics Committees for SINUS-24 (NCT02912468) and SINUS-52 (NCT02898454).

**SINUS-24**

|                                                                                                                                         |                                                                                                                                                                             |
|-----------------------------------------------------------------------------------------------------------------------------------------|-----------------------------------------------------------------------------------------------------------------------------------------------------------------------------|
| Bulgaria                                                                                                                                | Ethics Committee Multicenter Trials, 5 Sveta Nedelya Square, Sofia 1000                                                                                                     |
| Czech Republic                                                                                                                          | Eticka Komise Fakultni Nemocnice Hradec Kralove Sokolska 581, Hradec Kralove 500 05                                                                                         |
| France                                                                                                                                  | CPP Sud-Méditerranée 4 Centre Hôpitalier Universitaire de Montpellier Hôpital Saint Eloi 2, avenue Bertin Sans Montpellier Cedex 05 34295                                   |
| Germany                                                                                                                                 | Ethik-Kommission des Landes Berlin, Landesamt für Gesundheit und Soziales Berlin Geschäftsstelle der Ethik-Kommission des Landes Berlin, Fehrbelliner Platz 1, Berlin 10707 |
| Hungary                                                                                                                                 | Egészségügyi Tudományos Tanács, Klinikai Farmakológiai Etikai Bizottsága, Arany János út 6-8 Budapest 1051                                                                  |
| Italy                                                                                                                                   | Area Vasta Nord Ovest_AOUP Comitato per la sperimentazione clinica dei Medicinali, Via Roma 67, Pisa 56126, Pisa                                                            |
|                                                                                                                                         | AOU Policlinico-Vittorio, Emanuele, Via S. Sofia 78 Comitato Etico Catania 1, Catania 95123, Catania                                                                        |
|                                                                                                                                         | Ospedale di Circolo e, Fondazione Macchi, Comitato Etico, Viale Luigi Borri 57, Varese, 21100, Varese                                                                       |
|                                                                                                                                         | Ospedale San Raffaele, Via Olgettina 60, Comitato Etico, Milano, 20132, Milano                                                                                              |
|                                                                                                                                         | Istituto Clinico Humanitas, Comitato Etico dell'IRCCS, Istituto Clinico Humanitas di Rozzano (MI), Via Manzoni 56, Rozzano 20089, Milano                                    |
|                                                                                                                                         | Comitato Etico dell'A.O. San, Paolo, Via Di Rudini 8, Milano 20142, Milano                                                                                                  |
| Comitato Etico Interaziendale, Bologna-Imola, Comitato Etico Interaziendale, Bologna-imola, Via Castiglione 29, Bologna, 40124, Bologna |                                                                                                                                                                             |
| Netherlands                                                                                                                             | Medisch Ethische Toetsingscommissie Academisch, Medisch Centrum Meibergdreef 9, Amsterdam 1105 AZ                                                                           |
| Poland                                                                                                                                  | Komisja Bioetyczna przy Uniwersytecie Medycznym w Lodzi, Pl Hallera 1B Lodz 90-647, Łódzkie                                                                                 |
| Romania                                                                                                                                 | Nat Bioethics Committee of Medical Product - Medical Devices, 19-21 Stefan Cel Mare Street, District 2, Bucharest 020125                                                    |
| Russian Federation                                                                                                                      | Ethics Board at Ministry of Health of the Russian Federation, 3, Rakhmanovskiy per., Moscow, 127994                                                                         |
|                                                                                                                                         | LEC of the "Alliance, Biomedical – Russian, Group", LLC, 126, Griboedov canal emb., Saint-Petersburg, 190068                                                                |
|                                                                                                                                         | LEC of Saint-Petersburg, Research Institute of ENT, and Speech, 9, Bronnitskaya str., Saint-Petersburg, 190013                                                              |
|                                                                                                                                         | LEC of the Federal State, Institution "Polyclinic #3", 31 Grokholsky per., Moscow, 129090                                                                                   |
|                                                                                                                                         | LEC of the 1st Moscow State, Medical University n.a., Sechenov, 8/2 Trubetskaya str., Moscow, 119991                                                                        |
|                                                                                                                                         | LEC of the Clinical, Emergency Hospital, n.a.N.V.Solovyov, 11, Zagorodny Sad str., Yaroslavl' Russia, 150003, Yaroslavl', 150003, Russia                                    |
| LEC of St Petersburg State, Medical University n.a., Pavlov, 10 Rentgena str., St Petersburg, 197101                                    |                                                                                                                                                                             |

|                |                                                                                                                                        |
|----------------|----------------------------------------------------------------------------------------------------------------------------------------|
| Ukraine        | LEC of Poltava Regional, Clinical Hospital n.a., Sklyfosofsky, 23 Shevchenko Str., Poltava, 36011                                      |
|                | LEC of the Central City, Clinical Hospital, 114, Hetmana Mazepy Str., Ivano-Frankivsk, 76000                                           |
|                | LEC of the Regional clinical, Center of Radiation, Protection, 85 Novgorodska, Str., Kharkiv, 61166                                    |
|                | LEC of the Main Military, Medical Clinical Center, CMCH of MD, 18 Hospitalna Str., Kyiv, 01133                                         |
|                | LEC of the Institute of otolaryngology n.a. prof. O.S., Kolom, 3 Zoologichna Str., Kyiv, 03680                                         |
|                | LEC of Ternopil Municipal, City Hospital №2, 14 Kupchynskogo str., Ternopil, 46000                                                     |
| United Kingdom | Tayside Medical Science Centre, Residency Block, Level 3, Ninewells Hospital & Medical School, George Pirie Way, Dundee, DD1 9SY       |
| United States  | Copernicus Group IRB, 5000 CentreGreen Way, Suite 200, Cary, 27513, North Carolina                                                     |
|                | Copernicus Group IRB, One Triangle Drive, Suite 100, Durham, 27713, North Carolina                                                     |
|                | Vanderbilt University IRB, 1313 21st Ave. S, Rm., 504 Oxford House, Nashville, 37232, Tennessee                                        |
|                | Mayo Clinic IRB, 200 First Street SW, 201 Bldg. Room 4-60, Rochester, 55905, Minnesota                                                 |
|                | Western Institutional Review, Board, 1019 39th Avenue SE, Suite 120, Puyallup, 98374-2115, Washington                                  |
|                | Medical College of Wisconsin, / Froedtert Hospital, 8701 Watertown Plank Road, PO Box 26509, Milwaukee, 53226, Wisconsin               |
|                | Chesapeake Research, Review IRB, 6940 Columbia Gateway, Drive, Suite 110, Columbia, 21046, Maryland                                    |
|                | Office of Research Integrity, Medical University of SC, 19 Hagood Avenue, Room 601, P.O. Box 250857, Charleston, 29425, South Carolina |

**SINUS-52**

|           |                                                                                                                                                                   |
|-----------|-------------------------------------------------------------------------------------------------------------------------------------------------------------------|
| ARGENTINA | Comite de Etica en, Investigacion INAER, Arenales 3146 1A, Caba C1425BEN, Buenos Aires                                                                            |
|           | Investigaciones en Alergia y, Enfermedades Respiratorias, Arenales 3146 1B, Caba C1425BEN, Buenos Aires                                                           |
|           | Comite de Etica en, Farmacologia Clinica, Paraguay 2041 9no H, Caba C1121ABE, Buenos Aires                                                                        |
|           | Centro Medico de Enfermedades Respiratorias Esmeralda 1550, Vicente López B1602DQD, Buenos Aires Province                                                         |
|           | Comite Independiente de Etica para Ensayos en Farm. Clínica, Av. Cabildo 1536 5°B Caba C1426ABP, Buenos Aires                                                     |
|           | Comite de Etica Dr. Claude Bernard, San Lorenzo 2555 Rosario S2000KPG, Santa Fe                                                                                   |
| AUSTRALIA | The Alfred Research & Ethics Unit, Commercial Road, Prahran 3181, Victoria                                                                                        |
| AUSTRALIA | Monash Health Human Research Ethics Committee 246 Clayton Road, Clayton 3168, Victoria                                                                            |
| AUSTRALIA | Bellberry Limited, 129 Glen Osmond Road, Eastwood 5063, South Australia                                                                                           |
| BELGIUM   | UZ Gent, Corneel Heymanslaan 10 Dienst Neus- Keel en Oorheekunde, Gent 9000                                                                                       |
| CANADA    | The University of British Columbia Office of Research Ethics, Clinical Research Ethics Board, Room 210, 828 West 10th Avenue, Vancouver V5Z 1L8, British Columbia |
|           | Comite d'ethique de la recherche du CHUM, 900 rue St-Denis, Pavillon R, R03.456, Montreal H2X 0A9, Quebec, CANADA                                                 |
|           | Institutional Review Board Services (IRB Services) 372 Hollandview Trail, Suite 300, Aurora L4G 0A5, Ontario, CANADA                                              |
|           | Queen's University Health Sciences REB, Office of Research Services Fleming Hall/Jemmett Wing Kingston, K7L 3N6, Ontario, CANADA                                  |
| CHILE     | Comite de Etica de la Investigacion S.S.M Sur Oriente, Av. Concha y Toro # 3459 Puente Alto, Santiago 8207257, RM Region Metropolitan                             |
|           | Comité de Ética Científico, S.S. M Oriente, Av. Salvador # 364 Providencia Santiago, 7500922, RM Region Metropolitan                                              |
| ISRAEL    | Ethics Committee of Hillel Yaffe Medical Center, EC of Hillel Yaffe MC PO Box 169, Hadera 38100                                                                   |
|           | Ethics Committee of Rabin Medical Center, EC of Rabin Medical Center 39 Jabotinsky Street, Petach Tikva 49100                                                     |
|           | Galilee Medical Center Helsinki Committee of Galilee Medical Center, Nahariya 22100                                                                               |
|           | Ethics Committee of Kaplan Medical Center, EC of Kaplan MC, PO Box 1 Rehovot 76100                                                                                |
| JAPAN     | JCHO Shimonoseki Medical Center Institutional Review Board, 3-3-8 Kamishinchi-cho Shimonoseki-Shi 750-0061, Yamaguchi                                             |
|           | Shin Nihonbashi Ishii Clinic Insutitutional Review Board Kobunacho 8-6 Sinedobashi Bld.3kai, Nihombashi, Chuo-Ku 103-0024, Tokyo                                  |
|           | Japanese Red Cross Kyoto Daini Hospital IRB, 355-5 Haruobi-cho Kamanzadori Kamigyo-ku, Kyoto-Shi 602-8026, Kyoto                                                  |
|           | Institutional Review Board of Nippon Medical School Hospital, 1-1-5 Sendagi Bunkyo-Ku 113-8062, Tokyo                                                             |
|           | Institutional Review Board of KKR Tohoku Kosai Hospital 2-3-11 Kokubuncho, Aoba-ku Sendai-Shi 980-0803, Miyagi                                                    |
|           | Shinagawa East One Medical Clinic, 2-16-1 Konan Minato-Ku 108-0075, Tokyo                                                                                         |



|        |                                                                                                                                                                                                   |
|--------|---------------------------------------------------------------------------------------------------------------------------------------------------------------------------------------------------|
|        | Human Rights and Ethics for Clinical Studies IRB, 13-2, Ichiban-cho Chiyoda-Ku 102-0082, Tokyo                                                                                                    |
|        | Inst. Review Board of the University of Tokyo Hospital 7-3-1 Hongo, Bunkyo-Ku 113-8655, Tokyo                                                                                                     |
|        | Institutional Review Board of Kansai Medical Univ. Hospital 2-3-1, Shin-machi Hirakata-Shi 573-1191                                                                                               |
|        | Institutional Review Board of Hiroshima University Hospital 1-2-3, Kasumi, Minami-ku Hiroshima-Shi 734-8551, Hiroshima                                                                            |
|        | Nihon University Hospitals' Joint Institutional Review Board, 30-1 Oyaguchi Kami-cho Itabashi-Ku 173-8610, Tokyo                                                                                  |
|        | IRB of Kansai Medical University Medical Center 10-15, Fumizonochi Moriguchi-Shi, 570-8507 Osaka                                                                                                  |
|        | Rinku General Medical Center Institutional Review Board, 2-23 Rinkuourakita Izumisano-Shi 598-8577, Osaka                                                                                         |
|        | IRB of Nippon Medical School Chiba Hokusoh Hospital, 1715 Kamagari Inzai-Shi, 270-1694 Chiba                                                                                                      |
|        | Nippon Medical School Musashikosugi Hospital IRB 1-396 Kosugi-cho, Nakahara-ku, Kawasaki-Shi 211-8533, Kanagawa                                                                                   |
|        | IRB of Toho University Omori Medical Center, 6-11-1, Omorinishi Ota-Ku 143-8541                                                                                                                   |
|        | Institutional Review Board of Otemae Hospital, 1-5-34 Otemae, Chuo-ku Osaka-Shi 540-0008, Osaka                                                                                                   |
|        | Institutional Review Board of University of Fukui Hospital 23-3 Matsuokashimoaizuki, Eiheiji-cho Yoshida-Gun 910-1193, Fukui                                                                      |
|        | Kitakyusyu Municipal Medical Center IRB ,2-1-1 Basyaku, Kokurakita-ku Kitakyushu-Shi 802-0077, Fukuoka                                                                                            |
|        | IRB of Tohoku Medical & Pharmaceutical University Hospital, 1-12-1 Fukumuro Miyagino-ku, Sendai-Shi 983-8512, Miyagi                                                                              |
|        | Institutional Review Board of Tokyo Kyosai Hospital, 2-3-8 Nakameguro Meguro-Ku 153-8934, Tokyo                                                                                                   |
|        | IRB of Hoshikuma Dermatology Allergy Clinic 2-1-1 Noke, Sawara-ku Fukuoka-Shi 814-0171, Fukuoka                                                                                                   |
|        | Institutional Review Board of Okayama University Hospital 2-5-1 Shikata-cho, Kita-ku Okayama-Shi 700-8558, Okayama                                                                                |
|        | Institutional Review Board of Juntendo University Hospital 3-1-3 Hongo, Bunkyo-Ku 113-8431, Tokyo                                                                                                 |
|        | Institutional Review Board of JCHO Kyushu Hospital, 1-8-1 Kishinoura, Yahatanishi-ku Kitakyushu-Shi 806-8501, Fukuoka                                                                             |
|        | Institution Review Board of Osaka Medical College Hospital, 2-7, Daigakumachi Takatsuki-Shi 569-8686, Osaka                                                                                       |
|        | Sugiura Clinic Institutional Review Board, 4-4-16-301 Honcho Kawaguchi-Shi 332-0012, Saitama JAPAN                                                                                                |
|        | Tokyo-Eki Center-building Clinic Institutional Review Board, 3-3-14 Nihombashi Chuo-Ku 103-0027, Tokyo JAPAN                                                                                      |
| MEXICO | CEI Hospital Christus Muguerza del Parque S.A de C.V. Chih. Dr. Pedro Leal Rodriguez No. 1802 Col. Centro, Chihuahua 31000, Chihuahua                                                             |
|        | CEI Centro Hospitalario Vicor, Nebulosa No. 2956 Col. Jardines del Bosque, Guadalajara 44520, Jalisco                                                                                             |
|        | CI Instituto Jalisciense de Investigacion Clinica S.A de C.V, Penitenciaria No. 20. Col. Centro, Guadalajara 44100, Jalisco                                                                       |
|        | CEI de la Facultad de Medicina y HU de la UANL Av. Francisco I. Madero y Gonzalitos S/N Col. Mitras Centro, Monterrey 64460                                                                       |
|        | CI de la Facultad de Medicina y HU de la UANL Av. Francisco I. Madero y Gonzalitos S/N Col. Mitras Centro, CI del Hospital Universitario Dr. José Eleuterio Gonzalez, Monterrey 64460, Nuevo Leon |

|                       |                                                                                                                                                               |
|-----------------------|---------------------------------------------------------------------------------------------------------------------------------------------------------------|
|                       | CEI Hospital Angeles Chihuahua, Calle Haciendas del Valle No. 7120, Col. Plaza Las Haciendas, Chihuahua 31238, Chihuahua                                      |
| PORTUGAL              | CEIC - Comissão de Ética para a Investigação Clínica Parque da Saúde de Lisboa, Pav. 17-A, Avenida do Brasil nº 53, Lisboa 1749-004                           |
| RUSSIAN<br>FEDERATION | LEc of the Yaroslavl Regional Hospital, 7 Yakovlevskaya str., Yaroslavl', Russia, 150062 Yaroslavl' 150062, Russia                                            |
|                       | LEC of St Petersburg State Medical University n.a. Pavlov 10, Rentgena str. St Petersburg 197101                                                              |
|                       | LEC of the "Alliance Biomedical – Russian Group", LLC 126, Griboedov canal emb., Saint-Petersburg, 190068                                                     |
|                       | LEC of Stavropol Regional Clinical Hospital, 1, Semashko str. Stavropol 355030                                                                                |
|                       | LEC of Clinical Research Centre for Otorhinolaryngology 30/2, Volokolamskoe shosse, Moscow 123182                                                             |
| SPAIN                 | Hospital Clinic i Provincial Villarroel, 170 Barcelona 08036, Barcelona                                                                                       |
| SWEDEN                | Regionala etikprövningsnämnden i Stockholm, Regionala etikprövningsnämnden FE 289, Stockholm 171 77                                                           |
| TURKEY                | Istanbul Universitesi Tıp Fakultesi Yerel Etik Kurulu Istanbul Universitesi Istanbul Tıp Fakultesi, Tıbbi Arastirmalar Yerel Etik Kurulu, Capa Istanbul 34000 |
|                       | Türkiye İlaç ve Tıbbi Cihaz Kurumu, Sogutozu mah. 2176 sok no: 5, Cankaya- Ankara 06520                                                                       |
| UNITED<br>STATES      | Copernicus Group IRB 5000 CentreGreen Way, Suite 200 Cary 27513, North Carolina                                                                               |
|                       | Western Institutional Review Board, 1019 39th Avenue SE Suite 120, Puyallup 98374-2115, Washington                                                            |
|                       | University of Utah IRB 75 S 2000 East, RAB 111, Salt Lake City 84112, Utah                                                                                    |
|                       | Yale University Health Investigation Committee 25 Science Park, 3rd Floor, 150 Munson St. New Haven 06520, Connecticut                                        |
|                       | Brany IRB, 1981 Marcus Ave., Suite 210, Lake Success 11042, New York                                                                                          |
